# Supplementary material
Source: PubMed Central journal article supplement (PMC6591605)
Supplement: AAC.00291-19-s0001.pdf [file AAC.00291-19-s0001.pdf]

Table S1. Antimicrobial susceptibility of *E. faecalis* blood isolates stratified according to strain type

| Strain type | No. isolates | Rate (%) of antimicrobial susceptibility for blood isolates to the indicated antimicrobial: |      |          |      |            |   |               |      |                 |      |               |      |              |      |            |     |             |     |
|-------------|--------------|---------------------------------------------------------------------------------------------|------|----------|------|------------|---|---------------|------|-----------------|------|---------------|------|--------------|------|------------|-----|-------------|-----|
|             |              | Penicillin                                                                                  |      | Imipenem |      | Ampicillin |   | HL gentamicin |      | HL streptomycin |      | Ciprofloxacin |      | Tetracycline |      | Vancomycin |     | Teicoplanin |     |
|             |              | S                                                                                           | R    | S        | R    | S          | R | S             | R    | S               | R    | S             | R    | S            | R    | S          | R   | S           | R   |
| CC16        | 97           | 100                                                                                         | 0    | 100      | 0    | 100        | 0 | 69.5          | 30.5 | 83.2            | 16.8 | 72.6          | 3.2  | 3.2          | 96.8 | 100        | 0   | 100         | 0   |
| CC28        | 67           | 3.1                                                                                         | 96.9 | 4.6      | 55.4 | 100        | 0 | 27.7          | 72.3 | 83.1            | 16.9 | 4.6           | 93.8 | 3.1          | 96.9 | 100        | 0   | 100         | 0   |
| CC507       | 23           | 91.3                                                                                        | 8.7  | 91.3     | 0    | 100        | 0 | 30.4          | 69.6 | 100             | 0    | 0             | 100  | 0            | 95.7 | 100        | 0   | 100         | 0   |
| Others      | 108          | 100                                                                                         | 0    | 100      | 0    | 100        | 0 | 87.1          | 12.9 | 92.5            | 7.5  | 45.2          | 11.8 | 74.2         | 25.8 | 99.1       | 0.9 | 99.1        | 0.9 |

Abbreviations: CC, clonal complex; HL, high-level; S, susceptible; R, resistant.
